# Supplementary material for: ICU-Associated Gram-Negative Bloodstream Infection: Risk Factors Affecting the Outcome Following the Emergence of Colistin-Resistant Isolates in a Regional Greek Hospital
Source: MDPI journal article supplement (doi:10.3390/antibiotics11030405), 2022-03-17
Supplement: s1 [file s1]

## Supplementary Material

**Table S1. Patient characteristics regarding the 0.5ng/ml MIC threshold for colistin resistance (sensitivity analysis)**

|                                               | Overall (n=78)  | Colistin-resistant plus(n=44) | Colistin optimally sensitive (n=34) | p-value**   | Odds ratio (95% CI) ## |
|-----------------------------------------------|-----------------|-------------------------------|-------------------------------------|-------------|------------------------|
| <i>Baseline</i>                               |                 |                               |                                     |             |                        |
| Age, years                                    | 66(50.2-76)     | 69(57.7-78)                   | 62(47.2-73.7)                       | <b>0.10</b> |                        |
| Male                                          | 51(65.4)        | 32(72.7)                      | 19(55.8)                            | <b>0.15</b> |                        |
| Charlson Comorbidity Index                    | 3(1-5)          | 4(2-5)                        | 2.5(1-5)                            | <b>0.38</b> |                        |
| APACHE II                                     | 19(13-24)       | 20.5(15-24.2)                 | 17(12.2-19.7)                       | <b>0.02</b> | <b>1.10(1.02-1.20)</b> |
| SOFA score                                    | 8(5-10)         | 8.5(6-10)                     | 7.5(3.2-10.7)                       | <b>0.26</b> |                        |
| Prior ICU stay                                | 27(34.6)        | 17(38.6)                      | 10(29.4)                            | 0.47        |                        |
| Medical patients                              | 48(61.5)        | 28(63.6)                      | 20(58.8)                            | 0.81        |                        |
| Immunosuppression                             | 9(11.5)         | 6(13.6)                       | 3(8.8)                              | 0.72        |                        |
| Admission due to infection                    | 21(26.9)        | 8(18.2)                       | 13(38.2)                            | <b>0.07</b> | <b>0.26(0.08-0.77)</b> |
| Antibiotics in the previous 3 months          | 48(61.5)        | 28(63.6)                      | 20(58.8)                            | 0.81        |                        |
| <i>Before the event</i>                       |                 |                               |                                     |             |                        |
| Presence of CVC before the event*             | 61(78.2)        | 34(77.2)                      | 27(79.4)                            | >0.99       |                        |
| Antibiotics in the ICU                        | 61(78.2)        | 35(79.5)                      | 26(76.5)                            | 0.79        |                        |
| Maximum number of drugs with AGNA at any time |                 |                               |                                     | 0.72        |                        |
| None given                                    | 17(21.8)        | 9(20.5)                       | 8(23.5)                             |             |                        |
| Single                                        | 31(39.7)        | 15(34.1)                      | 16(47.1)                            |             |                        |
| Two                                           | 9(11.6)         | 6(13.6)                       | 3(8.8)                              |             |                        |
| Three                                         | 10(12.8)        | 6(13.6)                       | 4(11.8)                             |             |                        |
| Four                                          | 11(14.1)        | 8(18.2)                       | 3(8.8)                              |             |                        |
| Antibiotic classes / class members #          |                 |                               |                                     |             |                        |
| Third & fourth generation cephalosporins      | 26(33.3)        | 15(34.1)                      | 11(32.4)                            |             |                        |
| Colistin                                      | 28(35.9)        | 15(34.1)                      | 13(38.2)                            |             |                        |
| Tigecycline                                   | 24(30.8)        | 15(34.1)                      | 9(26.5)                             |             |                        |
| Carbapenems                                   | 33(42.3)        | 21(47.7)                      | 12(35.3)                            |             |                        |
| Aminoglycosides                               | 10(12.8)        | 6(13.6)                       | 4(11.8)                             |             |                        |
| Quinolones                                    | 13(16.7)        | 11(25)                        | 2(5.9)                              |             |                        |
| Ampicillin/sulbactam                          | 15(19.2)        | 9(20.5)                       | 6(17.6)                             |             |                        |
| Piperacillin/tazobactam                       | 9(11.5)         | 5(11.4)                       | 4(11.8)                             |             |                        |
| Ceftazidime/avibactam                         | 7(9)            | 5(11.4)                       | 2(5.9)                              |             |                        |
| <i>Index day</i>                              |                 |                               |                                     | NA          |                        |
| Event, days                                   | 10(6-18)        | 10(5.7-18)                    | 10.5(6.2-17)                        | 0.69        |                        |
| Timing of the event                           |                 |                               |                                     | >0.99       |                        |
| >48 hours stay                                | 67(85.9)        | 38(86.4)                      | 29(85.3)                            |             |                        |
| <48 hours stay                                | 11(14.1)        | 6(13.6)                       | 5(14.7)                             |             |                        |
| Source                                        |                 |                               |                                     | 0.96        |                        |
| Primary                                       | 32(41)          | 19(43.2)                      | 13(38.2)                            |             |                        |
| Catheter-related ¶                            | 25(32.1)        | 15(34.1)                      | 10(29.4)                            |             |                        |
| Urinary                                       | 5(6.4)          | 3(6.8)                        | 2(5.9)                              |             |                        |
| Intraabdominal                                | 5(6.4)          | 2(4.5)                        | 3(8.8)                              |             |                        |
| Surgical site infection                       | 5(6.4)          | 2(4.5)                        | 3(8.8)                              |             |                        |
| Lung/pleural empyema                          | 4(5.1)          | 2(4.5)                        | 2(5.9)                              |             |                        |
| Bone/joint                                    | 2(2.6)          | 1(2.3)                        | 1(2.9)                              |             |                        |
| Source control performed                      | 30(38.5)        | 17(38.6)                      | 13(38.2)                            | >0.99       |                        |
| Pitt bacteremia score                         | 3(1-4)          | 4(1-4.2)                      | 3(1-4)                              | 0.41        |                        |
| Septic shock                                  | 43(55.1)        | 26(59.1)                      | 17(50)                              | 0.49        |                        |
| Temperature max, °C                           | 38.5(37.9-39)   | 38.5(38-39)                   | 38.5(37.6-39)                       | 0.71        |                        |
| Fever                                         | 49(62.8)        | 28(63.6)                      | 21(61.8)                            | >0.99       |                        |
| Hypothermia                                   | 4(5.1)          | 1(2.3)                        | 3(8.8)                              | 0.31        |                        |
| SOFA score                                    | 6.5(3.8-11)     | 7.5(4-12.2)                   | 5(3-10.5)                           | 0.15        |                        |
| White Blood Cells /mm <sup>3</sup> , x1000    | 13.4(9.5-18.1)  | 13.43(10.13-19.62)            | 13.44(9.39-16.32)                   | 0.88        |                        |
| Leucopenia                                    | 2(2.6)          | 1(2.3)                        | 1(2.9)                              | >0.99       |                        |
| CRP, mg/l                                     | 121(62.7-155)   | 121(59.2-172.5)               | 120(71.9-141)                       | 0.67        |                        |
| Procalcitonin, µg/l                           | 1.23(0.34-2.08) | 1.39(0.43-1.96)               | 0.85(0.21-2.21)                     | 0.35        |                        |

Abbreviations: AGNA, anti-Gram-negative activity; APACHE II, Acute Physiology Assessment and Chronic Health Evaluation; CRP, C-reactive protein; CVC, central venous catheter; ICU, intensive care unit; MIC, minimal inhibitory concentration; SOFA, sequential organ failure assessment.

Apart from the cells where it is otherwise stated, all values are in median(IQR) and n(%)

\*For at least 48 hours.

# Often two or more combined antibiotics; only antibiotics with Gram-negative activity included. No comparison is feasible as patients were usually receiving more than a single antibiotic

¶24 central venous catheters and 1 peripherally inserted central catheter are included

\*\*Values in bold represent variables that entered the initial, full multivariable logistic regression model with response variable the development of colistin-resistant bacteremia at a lower threshold.

##The final model's explanatory variables included APACHE II score and admission due to infection.

**Table S2. Patient characteristics only regarding bacteremia acquisition >48 hours after ICU admission (sensitivity analysis).**

|                                               | Overall (n=67)     | Colistin-resistant (n=26) | Colistin-sensitive (n=41) | p-value**    | Odds ratio (95% CI) ## |
|-----------------------------------------------|--------------------|---------------------------|---------------------------|--------------|------------------------|
| <b>Baseline characteristics</b>               |                    |                           |                           |              |                        |
| Age                                           | 65(50-77)          | 72(59-78.7)               | 62(48-71)                 | <b>0.05</b>  |                        |
| Male                                          | 46(68.6)           | 19(73.1)                  | 27(65.8)                  | 0.60         |                        |
| Charlson comorbidity index                    | 3(1-5)             | 4(2.2-5)                  | 2(1-4)                    | <b>0.16</b>  |                        |
| APACHE II                                     | 19(12.5-22)        | 21.5(15.5-25)             | 17(10-19)                 | <b>0.002</b> | <b>1.14(1.05-1.27)</b> |
| SOFA admission                                | 8(5-10)            | 8.5(6.2-10.7)             | 7(4-10)                   | <b>0.13</b>  |                        |
| Prior ICU stay                                | 17(25.4)           | 6(23.1)                   | 11(26.8)                  | 0.78         |                        |
| Medical patients                              | 41(61.2)           | 18(69.2)                  | 23(56.1)                  | 0.32         |                        |
| Immunosuppression                             | 9(13.4)            | 6(23.1)                   | 3(7.3)                    | 0.08         |                        |
| Admission due to infection                    | 14(20.1)           | 3(11.5)                   | 11(26.8)                  | <b>0.22</b>  | <b>0.29(0.05-1.15)</b> |
| Antibiotics in the previous 3 months          | 37(55.2)           | 13(50)                    | 24(58.5)                  | 0.62         |                        |
| <b>Before the event</b>                       |                    |                           |                           |              |                        |
| Presence of CVC *                             | 56(83.6)           | 22(84.6)                  | 34(82.9)                  | >0.99        |                        |
| Antibiotics in the ICU, any                   | 61(91)             | 24(92.3)                  | 37(90.2)                  | >0.99        |                        |
| Maximum number of drugs with AGNA at any time |                    |                           |                           | 0.31         |                        |
| None given                                    | 6(9)               | 2(7.7)                    | 4(9.8)                    |              |                        |
| Single                                        | 31(46.3)           | 9(34.6)                   | 22(53.6)                  |              |                        |
| Two                                           | 9(13.4)            | 3(11.5)                   | 6(14.6)                   |              |                        |
| Three                                         | 10(14.9)           | 5(19.2)                   | 5(12.2)                   |              |                        |
| Four                                          | 11(16.4)           | 7(26.9)                   | 4(9.8)                    |              |                        |
| Antibiotic classes / class members #          |                    |                           |                           |              |                        |
| Third & fourth generation cephalosporins      | 26(38.8)           | 11(42.3)                  | 15(36.6)                  | 0.80         |                        |
| Colistin                                      | 23(34.3)           | 6(23.1)                   | 17(41.5)                  | 0.19         |                        |
| Tigecycline                                   | 24(35.8)           | 13(50)                    | 11(26.8)                  | <b>0.07</b>  |                        |
| Carbapenems                                   | 33(49.3)           | 14(53.8)                  | 19(46.3)                  | 0.62         |                        |
| Aminoglycosides                               | 10(14.9)           | 5(19.2)                   | 5(12.2)                   | 0.49         |                        |
| Quinolones                                    | 15(22.4)           | 8(30.8)                   | 7(17.1)                   | 0.23         |                        |
| Ampicillin/sulbactam                          | 15(22.4)           | 8(30.8)                   | 7(17.1)                   | 0.24         |                        |
| Piperacillin/tazobactam                       | 9(13.4)            | 4(15.4)                   | 5(12.2)                   | 0.73         |                        |
| Ceftazidime/avibactam                         | 7(10.4)            | 4(15.4)                   | 3(7.3)                    | 0.42         |                        |
| <b>Index Day</b>                              |                    |                           |                           |              |                        |
| Event, days                                   | 12(7-21)           | 13(9.2-23.5)              | 11(7-18)                  | 0.20         |                        |
| Source                                        |                    |                           |                           | >0.99        |                        |
| Primary                                       | 32(47.8)           | 13(50)                    | 19(46.3)                  |              |                        |
| Catheter-related ¶                            | 21(31.3)           | 9(34.6)                   | 12(29.3)                  |              |                        |
| Urinary                                       | 3(4.5)             | 1(3.8)                    | 2(4.9)                    |              |                        |
| Intraabdominal                                | 4(6)               | 1(3.8)                    | 3(7.3)                    |              |                        |
| Surgical site infection                       | 3(4.5)             | 1(3.8)                    | 2(4.9)                    |              |                        |
| Lung/pleural empyema                          | 3(4.5)             | 1(3.8)                    | 2(4.9)                    |              |                        |
| Bone/joint                                    | 1(1.5)             | 0(0)                      | 1(2.4)                    |              |                        |
| Source control                                | 24(35.8)           | 12(46.2)                  | 12(29.3)                  | 0.20         |                        |
| Pitt bacteremia score                         | 3(1-4)             | 4(2-4.7)                  | 3(1-4)                    | 0.23         |                        |
| Septic shock                                  | 35(52.2)           | 13(50)                    | 22(53.7)                  | 0.81         |                        |
| Temperature max, °C                           | 38.6(38.05-39.05)  | 38.5(38-38.95)            | 38.7(38.1-39.2)           | 0.52         |                        |
| Fever                                         | 45(67.2)           | 16(61.5)                  | 29(70.7)                  | 0.59         |                        |
| Hypothermia                                   | 1(1.5)             | 0(0)                      | 1(2.4)                    | >0.99        |                        |
| White Blood Cells /mm <sup>3</sup> , x1000    | 13.92(10.07-17.23) | 14.53(11.54-19.48)        | 13.43(9.64-16.44)         | 0.74         |                        |
| Leucopenia                                    | 1(1.5)             | 1(3.8)                    | 0(0)                      | >0.99        |                        |
| CRP, mg/l                                     | 123(67.4-151)      | 125(71.6-151)             | 123(63.2-151)             | 0.85         |                        |
| Procalcitonin, µg/l                           | 1.45(0.33-2.94)    | 1.48(0.56-2.94)           | 1.32(0.25-2.94)           | 0.44         |                        |

Abbreviations: AGNA, anti-Gram-negative activity; APACHE II, Acute Physiology Assessment and Chronic Health Evaluation CRP, C-reactive protein; CVC, central venous catheter; ICU, intensive care unit; SOFA, sequential organ failure assessment.

Apart from the cells where it is otherwise stated, all values are in median(IQR) and n(%)

\* For at least 48 hours;

# Often two or more combined antibiotics; only antibiotics with Gram – negative activity included. No comparison is feasible as patients were usually receiving more than a single antibiotic

¶24 central venous catheters and 1 peripherally inserted central catheter are included

\*\*Values in bold represent variables that entered the multivariable logistic regression model with response variable the development of colistin resistant bacteremia

##The final model's explanatory variables included APACHE II score and admission due to infection.

**Table S3. Evolution of clinical and laboratory indices at 48-hour intervals**

| Day                                   | -2                | 0                  | 2                 | 4                 | 6                 | 8                  | 10                 |
|---------------------------------------|-------------------|--------------------|-------------------|-------------------|-------------------|--------------------|--------------------|
| <b>WBC, x10<sup>3</sup>, overall*</b> | 11.7(9.15-14.8)   | 13.43(9.53-18.14)  | 11.8(8.16-16.7)   | 11(7.9-15)        | 12(9.1-15)        | 13(9.65-18)        | 12.67(8.46-15.78)  |
| -CRG                                  | 11.87(9.45-15.18) | 13.94(11.49-19.61) | 12.02(7.58-16.82) | 11.53(9.18-14.92) | 11.77(8.84-14.48) | 11.64(8.96-17.62)  | 14.18(8.76-16.69)  |
| -CSG                                  | 11.64(9.2-14.06)  | 12.95(9.28-16.50)  | 11.09(8.74-16.52) | 10.26(7.41-15.38) | 12.86(9.20-15.08) | 13.47(10.17-18.78) | 11.31(8.32-15.58)  |
| <b>Temperature, °C, overall*</b>      | 37.7(37.2-38.2)   | 38.5(37.8-39)      | 37.9(37.4-38.5)   | 37.7(37-38)       | 37.7(37-38)       | 38(37.3-38.2)      | 37.6(37.2-38.3)    |
| -CRG                                  | 37.7(37.2-38)     | 38.5(38-39)        | 38(37.1-38.5)     | 37.6(37-38.5)     | 37.5(37.2-38.2)   | 37.8(37.3-38.4)    | 37.5(37.2-38.6)    |
| -CSG                                  | 37.7(37.2-38.2)   | 38.6(37.8-39)      | 37.8(37.5-38.4)   | 37.8(37.4-38.4)   | 37.8(37.4-38.7)   | 37.8(37.3-38.2)    | 37.6(37.2-37.9)    |
| <b>CRP mg/l, overall*</b>             | 80.4(40-141)      | 120.5(62.7-155)    | 135(73.4-190)     | 88.1(49-146)      | 92.9(49-146)      | 67(38.85-108)      | 69.75(34.97-125.5) |
| -CRG                                  | 62.5(38.3-124.3)  | 125(60.7-198)      | 139(86.2-224)     | 87.7(56.4-145)    | 69.9(43.3-124.2)  | 58.9(36.7-84.8)    | 68.4(36.8-96.7)    |
| -CSG                                  | 92.8(47.3-141.5)  | 118(65.4-140.5)    | 131.5(66.5-167.5) | 92.3(45.8-157.7)  | 94.4(24.8-168)    | 86.7(40-143.5)     | 70.9(31-163.7)     |
| <b>PCT, ng/ml, overall*</b>           | 0.70(0.24-1.73)   | 1.225(0.34-2.08)   | 1.5(0.72-6.24)    | 1.21(0.4-2.8)     | 0.81(0.34-5.06)   | 0.7(0.415-2.05)    | 0.75(0.31-3.29)    |
| -CRG                                  | 0.99(0.27-1.71)   | 1.51(0.61-2.45)    | 3.73(1.17-6.9)    | 1.63(0.87-3.77) # | 0.77(0.53-3.25)   | 0.72(0.37-1.54)    | 0.55(0.26-1.98)    |
| -CSG                                  | 0.6(0.25-2.33)    | 1.01(0.25-1.92)    | 1.28(0.51-5.96)   | 0.78(0.34-1.54) # | 0.87(0.34-7.06)   | 0.69(0.62-3.93)    | 0.85(0.44-4.33)    |
| <b>SOFA, overall*</b>                 | 5(3-9)            | 7(4-11)            | 6(3-11)           | 6(3-9)            | 5(2-8)            | 5(3-10.3)          | 5(3-11)            |
| -CRG                                  | 6(4.2-11)         | 8(5-12.2)          | 6(4.5-11.5)       | 6(3-9)            | 5(3-7)            | 5(3.2-8)           | 5(4-11)            |
| -CSG                                  | 5(3-7)            | 5(3-10)            | 5(3-10)           | 4(2.5-10)         | 4(2-10)           | 5(2.2-13.2)        | 5(2-9.5)           |

Abbreviations: CRG, colistin-resistant group; CSG, colistin-sensitive group; CRP, C-reactive protein; PCT, procalcitonin; SOFA, sequential organ failure assessment., WBC, white blood cell count.

All values: median(IQR).

\*All p-values for parameter decrease between the early and the late days<0.01 (Tukey test, alternative method="less")

# p-value=0.04, between CRG and CSG.

**Table S4. Antibiotic treatment**

|                                             | Overall (n=78) | Colistin resistant(n=32) | Colistin sensitive(n=46) | p-value |
|---------------------------------------------|----------------|--------------------------|--------------------------|---------|
| <b><i>Empirical</i></b>                     |                |                          |                          |         |
| Empirical antibiotic therapy received*      | 65(83.3)       | 28(87.5)                 | 37(80.4)                 | 0.54    |
| One appropriate drug within first 24 hours  | 28(35.9)       | 10(31.2)                 | 18(39.1)                 | 0.63    |
| Two appropriate drugs within first 24 hours | 10(12.8)       | 3(9.4)                   | 7(15.2)                  | 0.51    |
| One appropriate drug within first 48 hours  | 33(42.3)       | 12(37.5)                 | 20(43.5)                 | 0.65    |
| Two appropriate drugs within first 48 hours | 14(17.9)       | 3(9.4)                   | 10(21.7)                 | 0.22    |
| Empirical colistin#, for at least 5 days    | 26(33.3)       | 7(21.9)                  | 19(41.3)                 | 0.09    |
| <b><i>Targeted</i></b>                      |                |                          |                          |         |
| Number of patients received                 | 66(78.2)       | 26(81.2)                 | 40(87)                   | 0.54    |
| Time to definite treatment, days            | 1(0-4)         | 3(0-5)                   | 0(0-3)                   | 0.07    |
| Number of targeted drugs                    |                |                          |                          | 0.51    |
| Monotherapy                                 | 33(42.3)       | 15(46.9)                 | 18(39.1)                 |         |
| Two drug combination                        | 26(33.3)       | 8(25)                    | 18(39.1)                 |         |
| Three drug combination                      | 7(9)           | 3(9.4)                   | 4(8.7)                   |         |
| Antibiotic de-escalation ¶                  | 6(7.7)         | 2(6.2)                   | 4(8.7)                   | >0.99   |
| Total duration of antibiotic treatment      | 11(8-16)       | 10.5(8-15.75)            | 14(11-18)                | 0.13    |
| Five-day colistin treatment                 | 44(56.4)       | 15(46.9)                 | 29(63)                   | 0.17    |
| Ten-day colistin treatment                  | 24(30.8)       | 6(18.7)                  | 18(39.1)                 | 0.08    |

\*Initiated up to 48 hours post event; #may include the continuation of the drug as targeted therapy up to day 5.

¶Within 5 days

**Table S5. Outcomes**

|                                                | Overall (n=78) | Colistin resistant (n=32) | Colistin sensitive (n=46) | p-value |
|------------------------------------------------|----------------|---------------------------|---------------------------|---------|
| 28-day mortality post event                    | 21(26.9)       | 8(25)                     | 13(28.3)                  | 0.80    |
| 14-day mortality post event                    | 18(23.1)       | 8(25)                     | 10(21.7)                  | 0.79    |
| ICU mortality                                  | 29(37.2)       | 11(34.4)                  | 18(39.1)                  | 0.85    |
| Hospital mortality                             | 31(39.7)       | 12(37.5)                  | 19(41.3)                  | 0.82    |
| ICU stay overall                               | 26(13.2-46.5)  | 31(13.5-51)               | 23.5(13.7-39.7)           | 0.32    |
| ICU stay post event                            | 14(6-26.2)     | 15.5(7-33)                | 14(5-22.2)                | 0.25    |
| Recurrent bacteremia                           | 13(16.7)       | 5(15.6)                   | 8(17.4)                   | 0.88    |
| Secondary bacteremia                           | 19(24.4)       | 10(31.2)                  | 9(19.6)                   | 0.47    |
| <i>Gram-negative</i>                           | 17(21.8)       | 8(25)                     | 9(19.6)                   |         |
| <i>Gram-positive</i>                           | 2(2.6)         | 2(6.2)                    | 0(0)                      |         |
| <i>Candida species</i>                         | 0(0)           | 0(0)                      | 0(0)                      |         |
| Mechanical ventilation days overall            | 14.5(3.7-28.2) | 17.5(2.5-32)              | 13(4-23.7)                | 0.58    |
| Mechanical ventilation days post event         | 4.5(1-13.5)    | 5.5(1-16.5)               | 4(0.2-11.5)               | 0.64    |
| Renal SOFA 7 days post event                   | 0(0-2)         | 0.5(0-3.2)                | 0(0-2)                    | 0.39    |
| Renal SOFA 14 days post event                  | 0(0-3.5)       | 0(0-2)                    | 0(0-4)                    | 0.94    |
| Renal replacement therapy on day 7 post event  | 12/56          | 6/24                      | 6/32                      | 0.74    |
| Renal replacement therapy on day 14 post event | 11/42          | 4/18                      | 7/24                      | 0.73    |
| Renal failure free days post event, days       | 9(2-18)        | 8.5(2-23.2)               | 9(2-17)                   | 0.71    |
| Readmission                                    | 5(6.4)         | 4(12.5)                   | 1(2.2)                    | 0.15    |

ICU, intensive care unit; SOFA, sequential organ failure assessment

**Table S6. Factors associated with 28-day mortality in patients with bacteremia acquisition >48 hours after ICU admission**

|                                                              | Dead(n=17)      | Alive(n=50)       | p-value #      | Hazard ratio (95% CI) ** |
|--------------------------------------------------------------|-----------------|-------------------|----------------|--------------------------|
| <i>Age</i>                                                   | 75(67-79)       | 60(46.2-71.7)     | <b>0.003</b>   |                          |
| <i>Male</i>                                                  | 11(64.7)        | 35(70)            | 0.76           |                          |
| <i>APACHE II</i>                                             | 19(18-22)       | 17(12-22)         | 0.18           |                          |
| <i>CCI</i>                                                   | 4(4-5)          | 2(0.25-4)         | <b>0.004</b>   |                          |
| <i>SOFA Admission</i>                                        | 9(8-12)         | 7(4.2-10)         | 0.09 ¶         |                          |
| <i>Prior ICU admission*</i>                                  | 5(29.4)         | 12(24)            | 0.75           |                          |
| <i>Infectious admission</i>                                  | 3(17.6)         | 14(28)            | >0.99          |                          |
| <i>Medical admission</i>                                     | 10(58.8)        | 31(62)            | >0.99          |                          |
| <i>Immunosuppression</i>                                     | 2(11.8)         | 7(14)             | >0.99          |                          |
| <i>Source control</i>                                        | 7(41.2)         | 17(34)            | 0.77           |                          |
| <i>Pitt bacteremia score</i>                                 | 4(3-6)          | 3(1-4)            | <b>0.02</b>    |                          |
| <i>Septic shock</i>                                          | 16(94.1)        | 19(38)            | <0.001         |                          |
| <i>Colistin resistant</i>                                    | 7(41.2)         | 19(38)            | >0.99          |                          |
| <i>Colistin MIC&lt;=0.5</i>                                  | 6(35.3)         | 23(46)            | 0.57           |                          |
| <i>Empirical colistin for at least 3 days</i>                | 15(88.2)        | 39(78)            | 0.49           |                          |
| <i>SOFA index day</i>                                        | 13(11-16)       | 4.5(3-8.5)        | <b>0.02 ##</b> | <b>1.23(1.12-1.34)</b>   |
| <i>Temperature index day, °C</i>                             | 38(37.6-38.5)   | 38.75(38.15-39.2) | 0.02           |                          |
| <i>Hypothermia</i>                                           | 1(5.9)          | 0(0)              | 0.25           |                          |
| <i>WBC index day, 10<sup>3</sup> / mm<sup>3</sup>, x1000</i> | 14.88(11-17.47) | 13.44(9.39-16.96) | 0.62           |                          |
| <i>CRP index day, mg/L</i>                                   | 123(71.9-151)   | 124(61.7-151)     | 0.87           |                          |
| <i>Procalcitonin index day, ng/mL</i>                        | 1.93(1.32-5.25) | 1.23(0.28-2.54)   | <b>0.04</b>    |                          |
| <i>Five-day empirical treatment with colistin</i>            | 10(58.8)        | 31(62)            | >0.99          |                          |
| <i>Ten-day colistin treatment, post event</i>                | 4(23.5)         | 19(38)            | 0.38           |                          |
| <i>One appropriate drug within 24h post event</i>            | 6(35.3)         | 18(36)            | >0.99          |                          |
| <i>One appropriate drug within 48h post event</i>            | 7(41.2)         | 21(42)            | >0.99          |                          |
| <i>Two appropriate drugs within 24h post event</i>           | 2(11.8)         | 6(12)             | >0.99          |                          |
| <i>Two appropriate drugs within 48h post event</i>           | 2(11.8)         | 10(20)            | 0.72           |                          |

All values are in median(IQR) and n(%)

APACHE II, Acute Physiology Assessment and Chronic Health Evaluation; CCI: Charlson comorbidity index; CI, confidence intervals; CRP, C-reactive protein; ICU, intensive care unit; MIC, minimal inhibitory concentration; SOFA, sequential organ failure assessment; WBC; white blood cell count.

\*2-12 months before the index admission

# Values in bold, represent variables that entered the initial, full multivariate Cox model with response variable the 28-day mortality.

¶ We only considered the index SOFA score as it was more recent and clinically more relevant than the admission score

\*\*Final Cox proportional hazard model where the explanatory variables were age and the index day SOFA score; the likelihood ratio test was the concordance index was 0.80 (se = 0.063).

**Table S7. Patient characteristics in relation to SOFA score on the index day (high and low according to median)**

|                                               | Overall (n=78)  | Increased SOFA (n=40) | Lower SOFA (n=38)  | p-value**    | Multivariable logistic regression analysis## |
|-----------------------------------------------|-----------------|-----------------------|--------------------|--------------|----------------------------------------------|
| <i><b>Baseline characteristics</b></i>        |                 |                       |                    |              |                                              |
| Age                                           | 66(50.2-76)     | 72.5(60.5-79)         | 63(47.7-71.7)      | <b>0.04</b>  | 1.03(1.0-1.07)                               |
| Male                                          | 51(65.4)        | 27(67.5)              | 24(63.2)           | 0.81         |                                              |
| Charlson comorbidity index                    | 3(1-5)          | 4(2-5)                | 2(0.2-4)           | <b>0.08</b>  |                                              |
| APACHE II                                     | 19(13-24)       | 18(12-21)             | 19.5(16-24)        | <b>0.02</b>  |                                              |
| SOFA admission                                | 8(5-10)         | 10(7-11.2)            | 6(3-9)             | <b>0.001</b> | 1.28(1.11-1.51)                              |
| Prior ICU stay                                | 27(34.6)        | 18(45)                | 9(23.7)            | <b>0.06</b>  | 3.98(1.33-13.4)                              |
| Medical patients                              | 48(61.5)        | 23(57.5)              | 25(65.8)           | 0.49         |                                              |
| Immunosuppression                             | 9(11.5)         | 6(15)                 | 3(7.9)             | 0.48         |                                              |
| Admission due to infection                    | 21(26.9)        | 10(25)                | 11(28.9)           | 0.80         |                                              |
| Antibiotics in the previous 3 months          | 48(61.5)        | 26(65)                | 22(57.9)           | 0.64         |                                              |
| <i><b>Before the event</b></i>                |                 |                       |                    |              |                                              |
| Presence of CVC *                             | 61(78.2)        | 34(85)                | 27(71.1)           | 0.17         |                                              |
| Antibiotics in the ICU, any                   | 61(78.2)        | 29(72.5)              | 32(84.2)           | 0.28         |                                              |
| Maximum number of drugs with AGNA at any time |                 |                       |                    | 0.28         |                                              |
| None given                                    | 17(21.8)        | 11(27.5)              | 6(15.8)            |              |                                              |
| Single                                        | 31(39.7)        | 11(27.5)              | 20(52.6)           |              |                                              |
| Two                                           | 9(11.6)         | 5(12.5)               | 4(10.5)            |              |                                              |
| Three                                         | 10(12.8)        | 5(12.5)               | 5(13.2)            |              |                                              |
| Four                                          | 11(14.1)        | 8(20)                 | 3(7.9)             |              |                                              |
| Antibiotic classes / class members #          |                 |                       |                    |              |                                              |
| Third & fourth generation cephalosporins      | 26(33.3)        | 11(34.4)              | 15(32.6)           | 0.34         |                                              |
| Colistin                                      | 28(35.9)        | 15(37.5)              | 13(34.2)           | 0.82         |                                              |
| Tigecycline                                   | 24(30.8)        | 13(32.5)              | 11(28.9)           | 0.81         |                                              |
| Carbapenems                                   | 33(42.3)        | 17(42.5)              | 16(42.1)           | >0.99        |                                              |
| Aminoglycosides                               | 10(12.8)        | 7(17.5)               | 3(7.9)             | 0.31         |                                              |
| Quinolones                                    | 13(16.7)        | 7(17.5)               | 6(15.8)            | >0.99        |                                              |
| Ampicillin/sulbactam                          | 15(19.2)        | 8(25)                 | 7(15.2)            | >0.99        |                                              |
| Piperacillin/tazobactam                       | 9(11.5)         | 4(12.5)               | 5(10.9)            | 0.73         |                                              |
| Ceftazidime/avibactam                         | 7(9)            | 3(7.5)                | 4(10.5)            | 0.71         |                                              |
| <i><b>Index Day</b></i>                       |                 |                       |                    |              | NA                                           |
| Event, days                                   | 10(6-18)        | 8.5(4-16.2)           | 12(7.2-22.7)       | 0.03         |                                              |
| Colistin resistant                            | 32(41)          | 19(47.5)              | 13(34.2)           | 0.26         |                                              |
| Timing of the event                           |                 |                       |                    | 0.19         |                                              |
| >48 hours stay                                | 67              | 32(80)                | 35(92.1)           |              |                                              |
| <48 hours stay                                | 11              | 8(20)                 | 3(7.9)             |              |                                              |
| Source                                        |                 |                       |                    | 0.19         |                                              |
| Primary                                       | 32(41)          | 14(35)                | 18(47.4)           |              |                                              |
| Catheter-related¶                             | 25(32.1)        | 12(30)                | 13(34.2)           |              |                                              |
| Urinary                                       | 5(6.4)          | 2(5)                  | 3(7.9)             |              |                                              |
| Intraabdominal                                | 5(6.4)          | 2(5)                  | 3(7.9)             |              |                                              |
| Surgical site infection                       | 5(6.4)          | 5(12.5)               | 0(0)               |              |                                              |
| Lung/pleural empyema                          | 4(5.1)          | 3(7.5)                | 1(2.6)             |              |                                              |
| Bone/joint                                    | 2(2.6)          | 2(5)                  | 0(0)               |              |                                              |
| Source control                                | 30(38.5)        | 15(37.5)              | 15(39.5)           | >0.99        |                                              |
| Pitt bacteremia score                         | 3(1-4)          | 4(4-6)                | 1(0-3)             | 0.0002       |                                              |
| Septic shock                                  | 43(55.1)        | 37(92.5)              | 6(15.8)            | <0.001       |                                              |
| Temperature max, °C                           | 38.5(37.9-39)   | 38.3(37.7-38.8)       | 38.7(38.1-39.3)    | 0.04         |                                              |
| Fever                                         | 49(62.8)        | 22(55)                | 27(71.1)           | 0.17         |                                              |
| Hypothermia                                   | 4(5.1)          | 4(12.5)               | 0(0)               | 0.12         |                                              |
| White Blood Cells /mm <sup>3</sup> , x1000    | 13.4(9.5-18.1)  | 14.88(11.1-19.76)     | 12.88(8.74-16.46)  | 0.22         |                                              |
| Leucopenia                                    | 2(2.6)          | 2(5)                  | 0(0)               | 0.49         |                                              |
| CRP, mg/l                                     | 121(62.7-155)   | 121.5(71.67-173.75)   | 118.5(58.58-138.5) | 0.20         |                                              |
| Procalcitonin, µg/l                           | 1.23(0.34-2.08) | 1.69(0.43-4.09)       | 0.72(0.27-1.5)     | 0.11         |                                              |

Abbreviations: AGNA, anti-Gram-negative activity; APACHE II, Acute Physiology Assessment and Chronic Health Evaluation; CRP, C-reactive protein; CVC, central venous catheter; ICU, intensive care unit; SOFA, sequential organ failure assessment.

Apart from the cells where it is otherwise stated, all values are in median(IQR) and n(%).

\*For at least 48 hours.

# Often two or more combined antibiotics; only antibiotics with Gram – negative activity included. No comparison is feasible as patients were usually receiving more than a single antibiotic

¶24 central venous catheters and 1 peripherally inserted central catheter are included

\*\* Values in bold represent variables that entered the initial, full multivariable logistic regression model with response variable the higher half of the index day SOFA score.

## The final model's explanatory variables included age, prior ICU stay, and admission SOFA score.

**Table S8. Outcomes of bloodstream infections regarding a 0.5ng/ml threshold for colistin resistance**

|                                                       | <b>Overall (n=78)</b> | <b>Colistin resistant plus (n=44)</b> | <b>Colistin optimally sensitive (n=34)</b> | <b>p-value</b> |
|-------------------------------------------------------|-----------------------|---------------------------------------|--------------------------------------------|----------------|
| 28-day mortality post event                           | 21(26.9)              | 12(27.3)                              | 9(26.5)                                    | >0.99          |
| 14-day mortality post event                           | 18(23.1)              | 12(27.3)                              | 6(17.6)                                    | 0.42           |
| ICU mortality                                         | 29(37.2)              | 17(38.6)                              | 12(35.3)                                   | 0.82           |
| Hospital mortality                                    | 31(39.7)              | 18(40.9)                              | 13(38.2)                                   | >0.99          |
| ICU stay overall                                      | 26(13.2-46.5)         | 28(12-47.5)                           | 23.5(17-42.2)                              | 0.85           |
| ICU stay post event                                   | 14(6-26.2)            | 12.5(6.7-28.2)                        | 15.5(5-23)                                 | 0.78           |
| Recurrent bacteremia                                  | 13(16.7)              | 6(13.6)                               | 7(20.6)                                    | 0.54           |
| Secondary bacteremia                                  | 19(24.4)              | 12(27.3)                              | 7(20.6)                                    | 0.51           |
| <i>Gram-negative</i>                                  | 17(21.8)              | 10(22.7)                              | 7(20.6)                                    |                |
| <i>Gram-positive</i>                                  | 2(2.6)                | 2(4.5)                                | 0(0)                                       |                |
| <i>Candida species</i>                                | 0(0)                  | 0(0)                                  | 0(0)                                       |                |
| Mechanical ventilation days overall                   | 14.5(3.7-28.2)        | 15.5(2-28.7)                          | 14(4.2-26.2)                               | 0.84           |
| Mechanical ventilation days post event                | 4.5(1-13.5)           | 4.5(0.2-12)                           | 4.5(1-16.7)                                | 0.74           |
| Renal SOFA 7 days post event                          | 0(0-2)                | 1(0-3.2)                              | 0(0-1.2)                                   | 0.13           |
| Renal SOFA 14 days post event                         | 0(0-3.5)              | 0(0-2.5)                              | 0(0-3)                                     | 0.44           |
| Renal replacement therapy on day 7 post event (n=56)  | 12                    | 8                                     | 4                                          |                |
| Renal replacement therapy on day 14 post event (n=42) | 11                    | 6                                     | 5                                          |                |
| Renal failure free days post event, days              | 9(2-18)               | 7(1.7-18.5)                           | 11(3.2-17.7)                               | 0.78           |
| Readmission                                           | 5(6.4)                | 5(11.4)                               | 0(0)                                       | 0.06           |

Abbreviations: ICU, intensive care unit; SOFA, sequential organ failure assessment



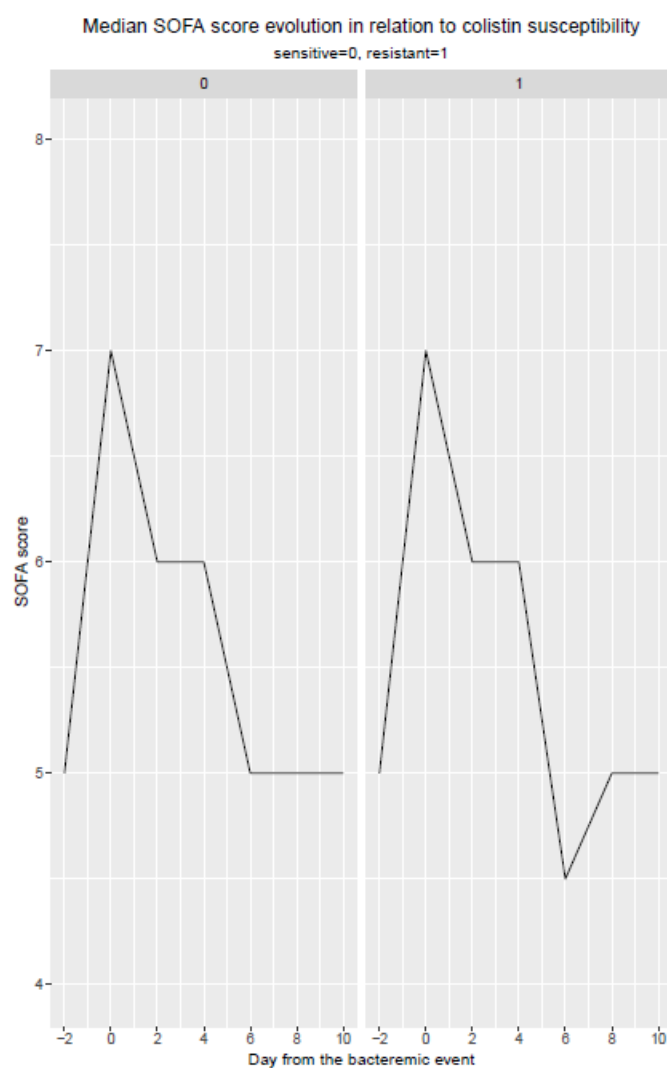

**Figure S1.** The evolution of the median SOFA score of both study groups every two days, starting from two days before the index day until day 10 post-event.
